# Supplementary material
Source: HighWire-hosted journal article supplement (https://cmaj.ca/highwire/filestream/57731/field_highwire_adjunct_files/0/editorial-f.pdf)
Supplement: editorial-f.pdf [file editorial-f.pdf]

## La lutte pour confiner le SRAS

Cet article a été publié sur le site [www.jamc.ca](http://www.jamc.ca), le 22 avril 2003.

**A**u moment d'aller sous presse, on avait signalé officiellement plus de 3200 cas de syndrome respiratoire aigu sévère (SRAS) dans 23 pays. Au Canada, 13 (12,4 %) des 105 personnes «probablement» atteintes du SRAS sont mortes<sup>1</sup>. Il se peut que des cas plus bénins se produisent sans qu'on les signale, mais il est trop tôt pour dire s'ils pourraient constituer une source d'infection attisant davantage l'épidémie.

On a confirmé que la maladie était attribuable à un coronavirus, maintenant appelé virus du SRAS. Comme les coronavirus semblables reconnus pour causer le rhume, le virus du SRAS semble se propager facilement par exposition à des gouttelettes. On rapporte qu'une seule personne en aurait infecté jusqu'à 112 autres. À mesure que les autorités de santé de Toronto continuent d'ajouter des noms à la liste des cas de SRAS et d'imposer la quarantaine à des centaines de contacts possibles, les années d'avertissements au sujet des répercussions de la facilité des voyages internationaux sur le contrôle des maladies infectieuses frappent dans le mille. Le compte rendu de David Patrick publié dans ce numéro met en évidence la valeur de la vigilance<sup>2</sup>.

L'isolement à l'hôpital des personnes infectées et la quarantaine volontaire à domicile de celles qui ont eu des contacts rapprochés avec les personnes infectées ont constitué les premiers efforts déployés pour enrayer la propagation de la maladie. On a étendu rapidement la quarantaine à domicile à quiconque aurait pu être exposé. Diverses administrations, y compris l'Ontario, Hong Kong, Singapour et les États-Unis, ont maintenant invoqué des pouvoirs législatifs pour imposer la quarantaine. Même si les efforts ont pu ralentir l'épidémie, ils ne l'ont pas enrayerée. À Hong Kong, tellement de personnes ont été exposées au SRAS que le système de santé publique semble dépassé. À Singapour, le ministre de la Santé Lim Hng Kiang a admis : «Ça va être long.» On a critiqué vivement la Chine parce qu'elle n'a pas signalé suffisamment les cas et l'OMS a estimé récemment qu'il y aurait jusqu'à 200 cas à Beijing, ce qui est inquiétant.

L'histoire du SRAS autour du globe comprend toutefois aussi quelques réussites. Pour tenter de diffuser l'information aussi rapidement que possible, des chercheurs et des cliniciens du monde entier ont collaboré et se sont efforcés de publier rapidement leurs résultats. Des journaux médicaux ont répondu à l'urgence. Les premiers rapports de cas étaient disponibles sur Internet moins de quatre semaines après l'apparition de la maladie à Hong Kong et à Toronto<sup>3,4</sup>. Peu après, on a affiché sur le site web de l'OMS ([www.who.int/csr/sars/primers/en/](http://www.who.int/csr/sars/primers/en/)) des séquences de fragments d'ARN afin de permettre aux laboratoires d'effectuer des essais PCR sur le virus incriminé. Le Centre de génomique de Vancouver a terminé récemment le séquençage génétique complet du coronavirus du SRAS et en a diffusé la séquence sur Internet afin de permettre la mise au point rapide d'un test de diagnostic ([www.bcgsc.ca/bioinfo/SARS/](http://www.bcgsc.ca/bioinfo/SARS/)). Pendant que les scientifiques du monde se hâtent pour mettre au point un vaccin ou un traitement, les médecins qui soignent des patients atteints du SRAS mettent en commun leurs expériences cliniques. Une telle capacité doit correspondre à l'espoir.

Dans ce numéro, nous publions un compte rendu de Robert Maunder et ses collaborateurs sur l'expérience qu'ils ont tirée de

la prise en charge de 19 patients atteints du SRAS à l'Hôpital Mount Sinai de Toronto<sup>5</sup>. Dans leur texte, qui devrait être utile à d'autres hôpitaux n'ayant pas encore eu de cas de SRAS, ils décrivent l'organisation des soins, les mesures prises pour aider le personnel et les patients à faire face à la maladie, ainsi que les effets généraux de la quarantaine et de l'isolement.

Parce qu'ils sont en contact rapproché avec les patients atteints du SRAS, les travailleurs de la santé sont particulièrement vulnérables à l'infection. Dans ce numéro aussi, Elizabeth VanDenKerkhof et ses collaborateurs de Kingston<sup>6</sup> décrivent comment ils ont mis au point et implanté rapidement un mécanisme de dépistage et de suivi en temps réel sur le web pour le personnel hospitalier. Ils présentent un compte rendu de la première semaine de fonctionnement du système et offrent leur logiciel gratuitement aux autres hôpitaux.

En attendant la mise au point d'un traitement spécifique, on a entrepris d'administrer aux patients atteints du SRAS, en particulier ceux qui ont une pneumonie, des antibiotiques à spectre large et du ribavirin, agent antiviral disponible au Canada seulement dans le cadre du programme de médicaments d'exception de Santé Canada. Dans ce numéro, au nom de la Société canadienne de pharmacologie clinique, Gideon Koren et ses collaborateurs présentent un bref aperçu du médicament ainsi que des conseils pratiques sur la façon de l'obtenir pour des patients<sup>7</sup>.

Nous continuerons de suivre de près le SRAS. Il est vrai que «ça pourrait être long». Pour le moment, nous continuerons d'utiliser notre page d'accueil ([www.jamc.ca](http://www.jamc.ca)) pour présenter des mises à jour sur la situation mondiale du SRAS et offrir des liens vers tous les articles publiés disponibles. Au cours des prochaines semaines, nous traiterons en accéléré les communications pertinentes pour les diffuser rapidement dans le *JAMC*él. Nous espérons sincèrement que le succès des efforts internationaux sera proportionnel au talent et à l'engagement des scientifiques et des professionnels de la santé des premières lignes. — *JAMC*

### Références

1. Hoey J, Maskalyk J. SARS update. *JAMC* [publication anticipée en direct le 17 avril 2003]. Disponible à l'adresse : [www.jamc.ca](http://www.jamc.ca).
2. Patrick DM. The race to outpace severe acute respiratory syndrome (SARS). *JAMC* [publication anticipée en direct le 17 avril 2003]. Disponible à l'adresse : [www.jamc.ca](http://www.jamc.ca).
3. Tsang KW, Ho PL, Ooi GC, Yee WK, Wang T, Chan-Yeung M, et al. A cluster of cases of severe acute respiratory syndrome in Hong Kong. *N Engl J Med* 1er avril 2003 [publication anticipée en direct]. Disponible à l'adresse : <http://nejm.org/earlyrelease/sars.asp> (consulté le 16 avril 2003).
4. Poutanen SM, Low DE, Henry B, Finkelstein S, Rose D, Green K, et al. Identification of severe acute respiratory syndrome in Canada. *N Engl J Med* 7 avril 2003 [publication anticipée en direct]. Disponible à l'adresse : <http://nejm.org/earlyrelease/sars.asp> (consulté le 16 avril 2003).
5. Maunder R, Hunter J, Vincent L, Bennett J, Peladeau N, Leszcz M, et al. The immediate psychological and occupational impact of the 2003 SARS outbreak in a teaching hospital. *JAMC* [publication anticipée en direct le 16 avril 2003]. Disponible à l'adresse : [www.jamc.ca](http://www.jamc.ca).
6. VanDenKerkhof EG, Goldstein DH, Rimmer MJ. Containing a new infection with new technology: a Web-based response to SARS. *JAMC* [publication anticipée en direct le 17 avril 2003]. Disponible à l'adresse : [www.jamc.ca](http://www.jamc.ca).
7. Koren G, King S, Knowles S, Phillips E. Ribavirin in the treatment of SARS: a new trick for an old drug? *JAMC* [publication anticipée en direct le 16 avril 2003]. Disponible à l'adresse : [www.jamc.ca](http://www.jamc.ca).
